# Supplementary material for: Fe3O4 hard templating to assemble highly wrinkled graphene sheets into hierarchical porous film for compact capacitive energy storage
Source: Royal Society of Chemistry journal article supplement (doi:10.1039/c9ra02132a), 2019-01-01
Supplement: c9ra02132a1.pdf [file c9ra02132a1.pdf]

Supplementary Information

**Fe<sub>3</sub>O<sub>4</sub> Hard Templating to Assemble Highly Wrinkled Graphene Sheets into  
Hierarchical Porous Film for Compact Capacitive Energy Storage**

Hua Fang<sup>\*,a</sup>, Fanteng Meng<sup>a</sup>, Ji Yan<sup>\*,a</sup>, Gao-yun Chen<sup>b</sup>, Linsen Zhang<sup>a</sup>, Shide Wu<sup>a</sup>, Shichao Zhang<sup>\*,c</sup>,

Lizhen Wang<sup>a</sup>, Yongxia Zhang<sup>a</sup>

<sup>a</sup>School of Material and Chemical Engineering, Zhengzhou University of Light Industry, Zhengzhou

450001, PR China

b. Institute of Chemical Defense, Beijing, 102205, PR China

<sup>c</sup>School of Materials Science and Engineering, Beihang University, Beijing, 100191, PR China

**Figure S1**

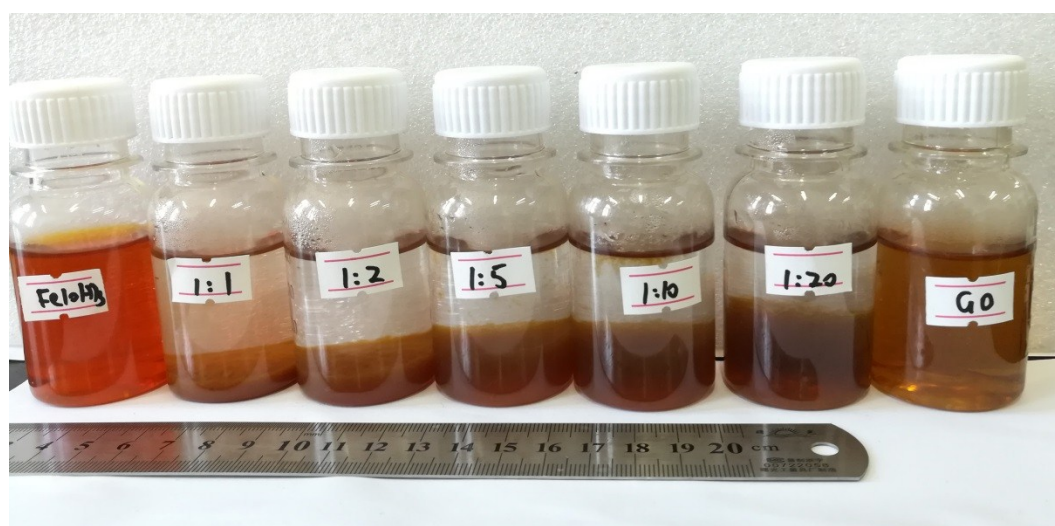

**Fig.**

**S1** The flocculent precipitate formed with the different volume ratio of GO hydrosol and Fe(OH)<sub>3</sub> colloid solution ranging from 1:1 to 1:20 (the photo was taken after the hybrids were subjected to 9 hours standing).

---

\* Corresponding author. E-mail addresses: fh@zzuli.edu.cn (Hua Fang),  
jiyan@zzuli.edu.cn (Ji Yan), csc@buaa.edu.cn (Shichao Zhang)

**Figure S2**

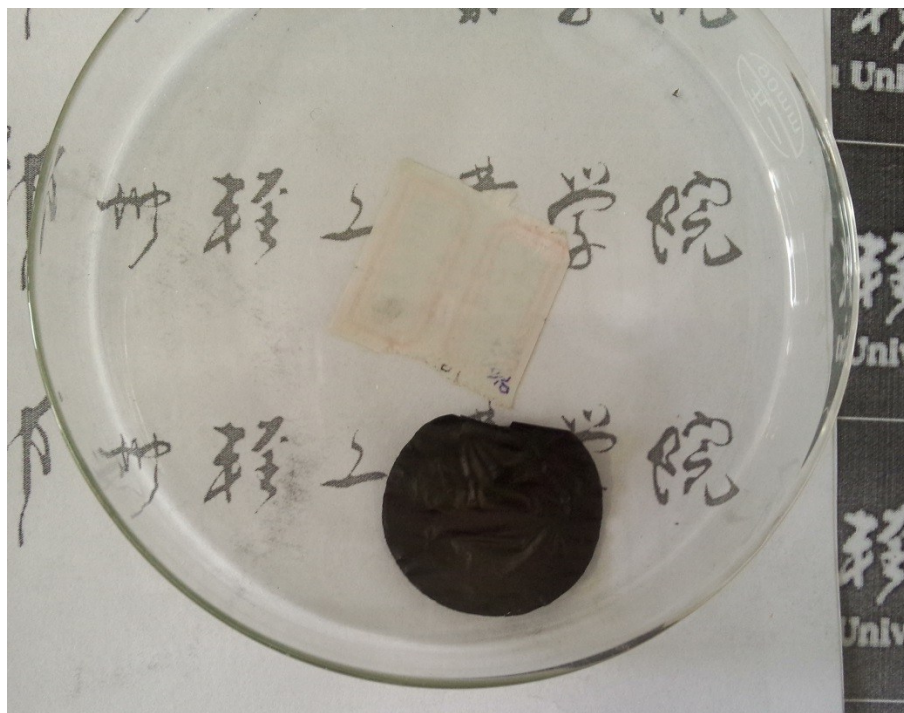

Fig. S2 The image of the generated highly wrinkled graphene film (HWGF)

**Figure S3**

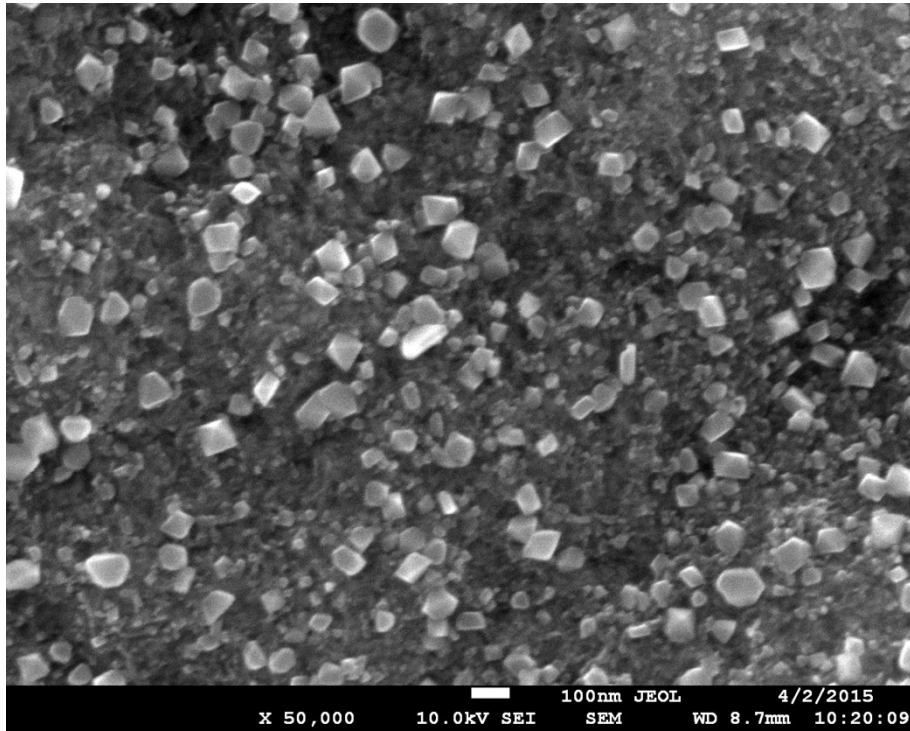

Fig. S3 Top view SEM image of the Fe<sub>3</sub>O<sub>4</sub>@rGO hybrid film
